# Supplementary material for: Behavioral decline in Shank3Δex4–22 mice during early adulthood parallels cerebellar granule cell glutamatergic synaptic changes
Source: PubMed Central journal article supplement (PMC11616285; doi:10.1186/s13229-024-00628-y), 2024-12-04
Supplement: 13229_2024_628_MOESM1_ESM.pdf [file 13229_2024_628_MOESM1_ESM.pdf]

|                         |              |             |                 |        |              |        |              |       |              |        |              |       |              |       |       |       |       |       |       |    |       |              |              |              |              |
|-------------------------|--------------|-------------|-----------------|--------|--------------|--------|--------------|-------|--------------|--------|--------------|-------|--------------|-------|-------|-------|-------|-------|-------|----|-------|--------------|--------------|--------------|--------------|
|                         |              |             | Juvenile Male   |        |              |        |              |       |              |        |              |       |              |       |       |       |       | 15    | 15    | 13 | 0.403 | <b>0.000</b> | <b>0.042</b> |              |              |
|                         |              |             | Adult Female    |        |              |        |              |       |              |        |              |       |              |       |       |       |       | 16    | 14    | 13 | 1.000 | 1.000        | 1.000        |              |              |
|                         |              |             | Juvenile Female |        |              |        |              |       |              |        |              |       |              |       |       |       |       | 11    | 14    | 12 | 1.000 | 0.649        | 0.748        |              |              |
| Marbles                 | <b>0.001</b> | Kruskal     |                 | 39.379 | <b>0.000</b> |        |              |       |              |        |              |       |              |       |       |       |       | 48    | 49    | 51 | 1.000 | <b>0.000</b> | <b>0.000</b> |              |              |
| Burried - 30 min        |              | Wallis H    | Adult           | 27.991 | <b>0.000</b> |        |              |       |              |        |              |       |              |       |       |       |       | 28    | 26    | 30 | 0.364 | <b>0.000</b> | <b>0.001</b> |              |              |
|                         |              |             | Juvenile        | 20.733 | <b>0.000</b> |        |              |       |              |        |              |       |              |       |       |       |       | 20    | 23    | 21 | 0.893 | <b>0.004</b> | <b>0.000</b> |              |              |
|                         |              |             | Adult Male      | 18.814 | <b>0.000</b> |        |              |       |              |        |              |       |              |       |       |       |       | 15    | 13    | 17 | 1.000 | <b>0.000</b> | <b>0.008</b> |              |              |
|                         |              |             | Juvenile Male   | 8.556  | <b>0.014</b> |        |              |       |              |        |              |       |              |       |       |       |       | 10    | 12    | 11 | 1.000 | 0.096        | <b>0.016</b> |              |              |
|                         |              |             | Adult Female    | 9.126  | <b>0.010</b> |        |              |       |              |        |              |       |              |       |       |       |       | 13    | 13    | 13 | 0.646 | <b>0.008</b> | 0.232        |              |              |
|                         |              |             | Juvenile Female | 11.381 | <b>0.003</b> |        |              |       |              |        |              |       |              |       |       |       |       | 10    | 11    | 10 | 1.000 | 0.061        | <b>0.003</b> |              |              |
| Y-Maze - Total Entries  | 0.305        | 3-way ANOVA | All Combined    |        |              | 19.606 | <b>0.000</b> | 0.369 | 0.544        | 15.698 | <b>0.000</b> | 2.894 | 0.058        | 0.671 | 0.513 | 0.167 | 0.683 | 0.836 | 0.435 | 54 | 58    | 54           | 0.232        | <b>0.000</b> | <b>0.000</b> |
|                         |              |             | Adult           |        |              |        |              |       |              |        |              |       |              |       |       |       |       | 30    | 27    | 30 | 0.112 | <b>0.001</b> | 0.465        |              |              |
|                         |              |             | Juvenile        |        |              |        |              |       |              |        |              |       |              |       |       |       |       | 24    | 31    | 24 | 1.000 | <b>0.000</b> | <b>0.000</b> |              |              |
|                         |              |             | Adult Male      |        |              |        |              |       |              |        |              |       |              |       |       |       |       | 14    | 13    | 15 | 0.847 | 0.585        | 1.000        |              |              |
|                         |              |             | Juvenile Male   |        |              |        |              |       |              |        |              |       |              |       |       |       |       | 12    | 18    | 12 | 1.000 | <b>0.002</b> | <b>0.001</b> |              |              |
|                         |              |             | Adult Female    |        |              |        |              |       |              |        |              |       |              |       |       |       |       | 16    | 14    | 15 | 0.173 | <b>0.000</b> | 0.195        |              |              |
|                         |              |             | Juvenile Female |        |              |        |              |       |              |        |              |       |              |       |       |       |       | 12    | 13    | 12 | 1.000 | <b>0.002</b> | <b>0.009</b> |              |              |
| Y-Maze - Alternation %  | 0.959        | 3-way ANOVA | All Combined    |        |              | 2.133  | 0.122        | 0.310 | 0.578        | 1.081  | 0.300        | 0.360 | 0.698        | 0.640 | 0.528 | 1.365 | 0.244 | 1.669 | 0.192 | 54 | 58    | 54           |              |              |              |
|                         |              |             | Adult           |        |              |        |              |       |              |        |              |       |              |       |       |       |       | 30    | 27    | 30 |       |              |              |              |              |
|                         |              |             | Juvenile        |        |              |        |              |       |              |        |              |       |              |       |       |       |       | 24    | 31    | 24 |       |              |              |              |              |
|                         |              |             | Adult Male      |        |              |        |              |       |              |        |              |       |              |       |       |       |       | 14    | 13    | 15 |       |              |              |              |              |
|                         |              |             | Juvenile Male   |        |              |        |              |       |              |        |              |       |              |       |       |       |       | 12    | 18    | 12 |       |              |              |              |              |
|                         |              |             | Adult Female    |        |              |        |              |       |              |        |              |       |              |       |       |       |       | 16    | 14    | 15 |       |              |              |              |              |
|                         |              |             | Juvenile Female |        |              |        |              |       |              |        |              |       |              |       |       |       |       | 12    | 13    | 12 |       |              |              |              |              |
| Social Preference Index | 0.246        | 3-way ANOVA | All Combined    |        |              | 1.770  | 0.174        | 3.081 | 0.081        | 2.203  | 0.140        | 3.676 | <b>0.028</b> | 0.600 | 0.550 | 0.325 | 0.570 | 0.043 | 0.957 | 56 | 53    | 52           | 1.000        | 0.279        | 0.347        |
|                         |              |             | Adult           |        |              |        |              |       |              |        |              |       |              |       |       |       |       | 33    | 25    | 30 | 1.000 | <b>0.004</b> | <b>0.023</b> |              |              |
|                         |              |             | Juvenile        |        |              |        |              |       |              |        |              |       |              |       |       |       |       | 23    | 28    | 22 | 1.000 | 1.000        | 1.000        |              |              |
|                         |              |             | Adult Male      |        |              |        |              |       |              |        |              |       |              |       |       |       |       | 16    | 14    | 16 | 1.000 | <b>0.025</b> | 0.181        |              |              |
|                         |              |             | Juvenile Male   |        |              |        |              |       |              |        |              |       |              |       |       |       |       | 12    | 15    | 9  | 1.000 | 1.000        | 1.000        |              |              |
|                         |              |             | Adult Female    |        |              |        |              |       |              |        |              |       |              |       |       |       |       | 17    | 11    | 14 | 1.000 | 0.146        | 0.166        |              |              |
|                         |              |             | Juvenile Female |        |              |        |              |       |              |        |              |       |              |       |       |       |       | 11    | 13    | 13 | 1.000 | 1.000        | 1.000        |              |              |
| Social Novelty Index    | 0.098        | 3-way ANOVA | All Combined    |        |              | 0.287  | 0.751        | 5.556 | <b>0.020</b> | 0.336  | 0.563        | 0.822 | 0.442        | 0.359 | 0.699 | 2.486 | 0.117 | 1.104 | 0.335 | 53 | 48    | 48           | 1.000        | 1.000        | 1.000        |
|                         |              |             | Adult           |        |              |        |              |       |              |        |              |       |              |       |       |       |       | 31    | 25    | 28 | 1.000 | 1.000        | 1.000        |              |              |
|                         |              |             | Juvenile        |        |              |        |              |       |              |        |              |       |              |       |       |       |       | 22    | 23    | 20 | 1.000 | 0.707        | 1.000        |              |              |
|                         |              |             | Adult Male      |        |              |        |              |       |              |        |              |       |              |       |       |       |       | 14    | 14    | 15 | 1.000 | 1.000        | 1.000        |              |              |
|                         |              |             | Juvenile Male   |        |              |        |              |       |              |        |              |       |              |       |       |       |       | 12    | 12    | 9  | 1.000 | 1.000        | 1.000        |              |              |
|                         |              |             | Adult Female    |        |              |        |              |       |              |        |              |       |              |       |       |       |       | 17    | 11    | 13 | 1.000 | 1.000        | 1.000        |              |              |
|                         |              |             | Juvenile Female |        |              |        |              |       |              |        |              |       |              |       |       |       |       | 10    | 11    | 11 | 1.000 | 1.000        | 1.000        |              |              |
